# Supplementary material for: Osteotropic Effect of Parenteral Obesity in Programmed Male Rats Fed a Calorically Differentiated Diet during Growth and Development
Source: MDPI journal article supplement (doi:10.3390/ani12182314), 2022-09-06
Supplement: s1 [file s1]

Table S1. The content of the standard (S) and high-energy (F) diets.

| Ingredients           | Standard diet (S) | High-energy diet (F) |
|-----------------------|-------------------|----------------------|
| Metabolic Energy      | 11.50 MJ/kg       | 17.6 MJ/kg           |
| Crude protein         | 16.00%            | 19.0%                |
| Crude fat min.        | 2.80%             | 16.0%                |
| Crude ash max.        | 7.00%             | 5.58%                |
| Crude fiber max.      | 5.00%             | 3.86%                |
| Carbohydrate          | 65%               | 65%                  |
| Lysine                | 0.80%             | 1.2%                 |
| Methionine + Cysteine | 0.50%             | 0.76%                |
| Tryptophan            | 0.190%            | 0.27%                |
| Vitamin A             | 8000 IU/kg        | 8000 IU/kg           |
| Vitamin D3            | 1000 IU/kg        | 1000 IU/kg           |
| Vitamin E             | 50 mg/kg          | 76.9 mg/kg           |
| Vitamin K3            | 0.24%             | 0.24%                |
| Vitamin B1            | 0.8%              | 0.8%                 |
| Vitamin B2            | 0.6%              | 0.6%                 |
| Vitamin B6            | 1.1%              | 1.1%                 |
| Vitamin B12           | 0.004%            | 0.004%               |
| Biotin                | 0.04%             | 0.04%                |
| Folic acid            | 0.2%              | 0.2%                 |
| Nicotinic acid        | 7.78%             | 7.78%                |
| Pantothenic acid      | 2.17%             | 2.17%                |
| Linoleic acid         | 2%                | 2%                   |
| Calcium               | 1.10 %            | 1.32%                |
| Phosphorus            | 0.70 %            | 0.64%                |
| Sodium                | 0.22 %            | 0.19%                |
| Magnesium             | 0.3%              | 0.3%                 |
| Manganese             | 0.005%            | 0.005%               |
| Iodine                | 0.02%             | 0.02%                |
| Copper                | 1.16%             | 1.16%                |
| Sulfur                | 0.14%             | 0.14%                |
| Zinc                  | 6.26%             | 6.26%                |
| Selenium              | 0.03%             | 0.03%                |
